# Supplementary material for: A “Seed-and-Soil” Radiomics Model Predicts Brain Metastasis Development in Lung Cancer: Implications for Risk-Stratified Prophylactic Cranial Irradiation
Source: MDPI journal article supplement (doi:10.3390/cancers15010307), 2023-01-02
Supplement: s1 [file s1]

Article

# A “Seed-and-Soil” Radiomics Model Predicts Brain Metastasis Development in Lung Cancer: Implications for Risk-Stratified Prophylactic Cranial Irradiation

Xiao Chu, Jing Gong, Xi Yang, Jianjiao Ni, Yajia Gu and Zhengfei Zhu

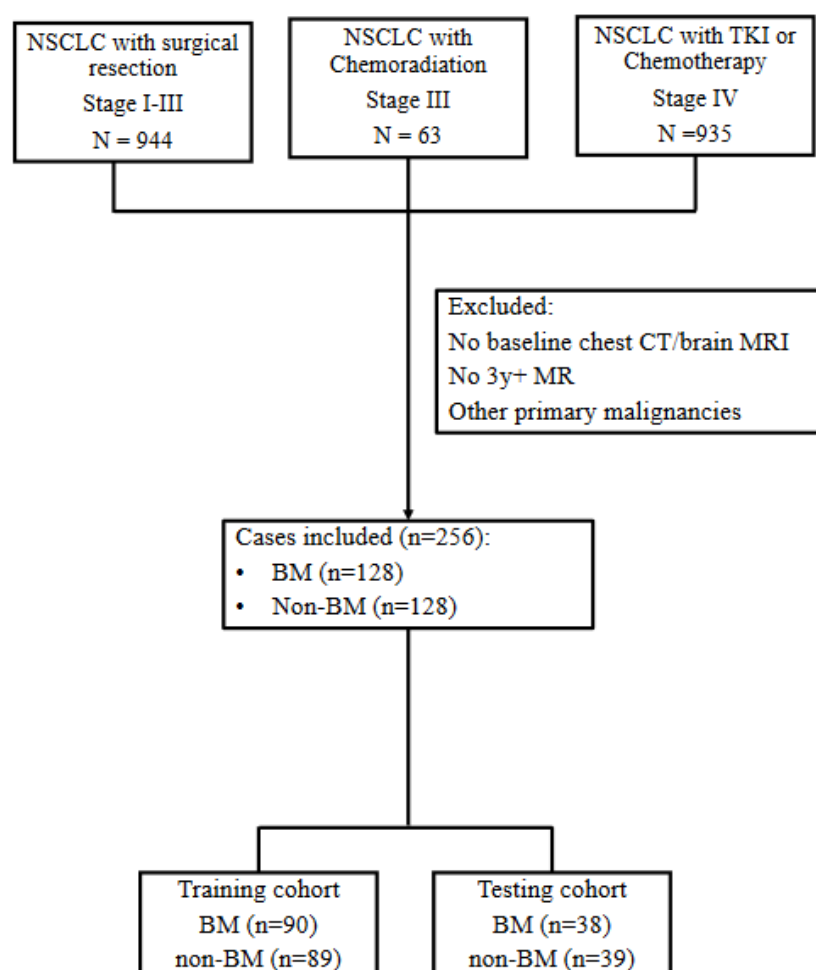

**Figure S1.** Patient selection workflow.
